# Supplementary material for: Thermodynamic origin of the structural transition pathway in metal oxide nanoparticles under acoustic shocked conditions
Source: Royal Society of Chemistry journal article supplement (doi:10.1039/d5cp04180e), 2025-12-23
Supplement: d5cp04180e1.pdf [file d5cp04180e1.pdf]

**Supporting Information**

**The thermodynamic origin for the structural transition pathway in metal oxide  
nanoparticles under acoustic shock excitation states**

Sivakumar Aswathappa<sup>1</sup>, Lidong Dai<sup>1\*</sup>, Sahaya Jude Dhas Sathiyadhas<sup>2</sup>

<sup>1</sup>School of Physics and Electronic Science, Guizhou Normal University, Guiyang, 550025, China

<sup>2</sup>Saveetha School of Engineering, Saveetha Institute of Medical and Technical Sciences,  
Saveetha University, Chennai, Tamil Nadu, 602105, India

**Corresponding author:** [dailidong@vip.gyig.ac.cn](mailto:dailidong@vip.gyig.ac.cn), [dailidong@gznu.edu.cn](mailto:dailidong@gznu.edu.cn)

## Experimental section

### Shock wave loading procedure

The required shock waves are generated by an in-house semiautomatic Reddy Tube which is capable of producing shock waves. It has three sections such as driver, driven and diaphragm sections. The driver and driven sections are made of seamless steel tubes of length 48 cm and 33 cm, respectively and both have the same inner diameter of 1.5 cm. Atmospheric air is used as the working substance for the required shock wave generation which is supplied by a tabletop mini 1 HP air compressor that has the capacity of 8 bars pressure storage. The diaphragm section separates the driver section and the driven section. Carbonless paper diaphragms are fed into the diaphragm section with the help of a motor. While the atmospheric air is being compressed into the driver section, at the critical pressure, the diaphragm is ruptured such that the shock wave is generated and moves along the driven section.

An indigenously developed semi-automatic Reddy tube has been used to generate the shock waves. In the present experiment, shock waves of Mach number 2.2 have been utilized possessing the dynamic transient pressure of 2 MPa and temperature 864 K. The shock waves from the driven section go on striking the sample which is located 1 cm away from the open end of the driven section. One end of the driver section is connected to the diaphragm section which has two pneumatic cylinders and the other end is connected to the compressor. The pressurized air is also utilized for the operation of pneumatic cylinders. Using the pressure controller of the driver section, we can control the input pressure range of the driver section and the schematic diagram is presented in **Fig. S1 (a, b)**.

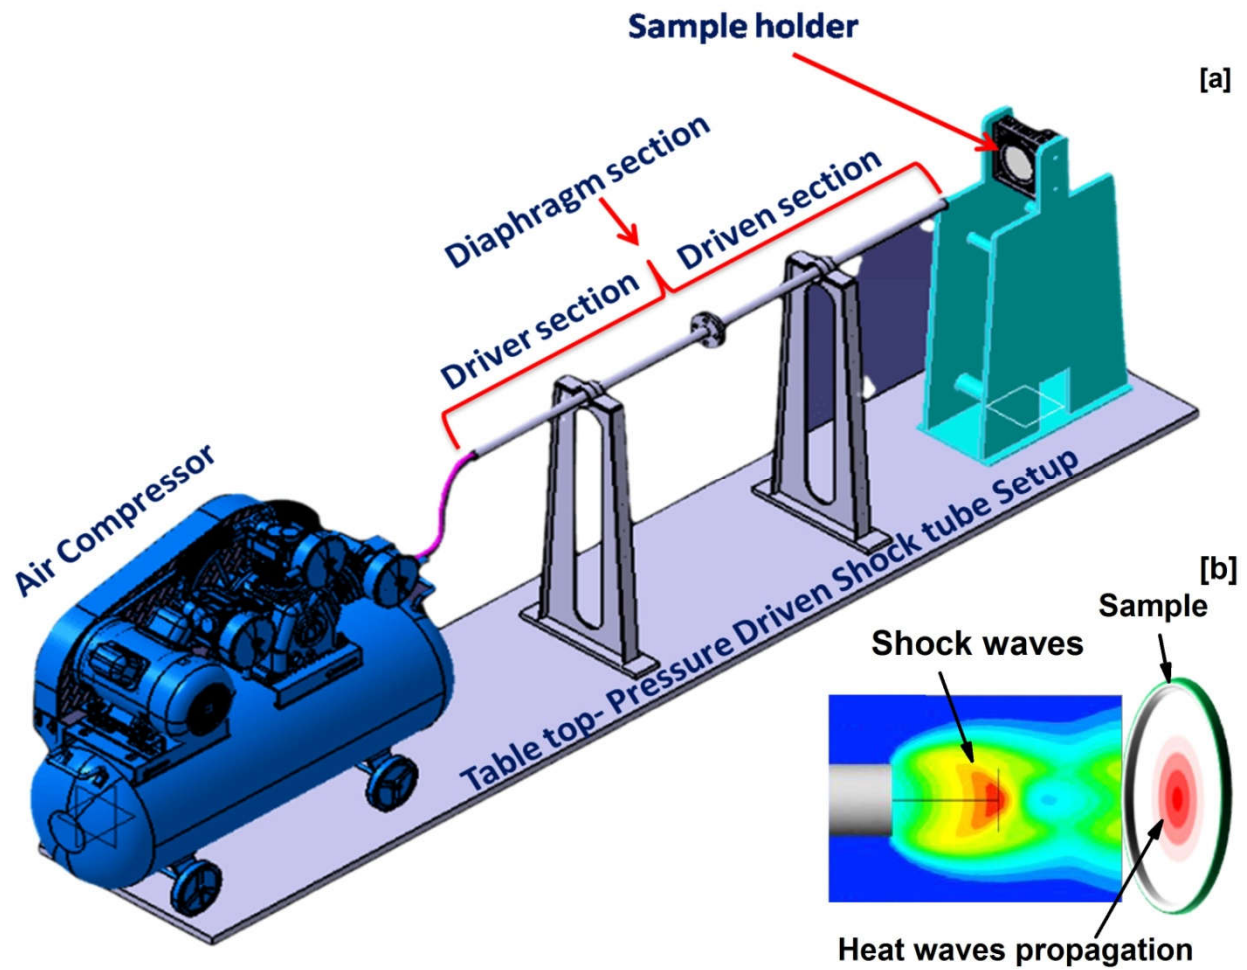

**Fig. S1** (a) Schematic diagram of the table top pressure driven shock tube (b) shock propagation on the sample

### Operation of the shock tube

Pressure of the air in the driver section is gradually increased by the air compressor until the diaphragm ruptures which leads to the generation of shock wave traveling along the axis of the driven section. The required numbers of test samples are to be placed one by one in the sample holder which is typically placed 1cm away from the open end of the driven section. Subsequently, required numbers of shock pulses are loaded on the respective test sample with an interval of 5 sec between each shock pulse. 100 number of shock pulse means that the sample is

exposed for 100 times by shock wave of a particular Mach number. After the completion of the shock wave loading experiment, the control and shock wave loaded samples are sent for analytical studies.

### **R-H relations**

$$P_2 = P_1 \left[ 1 + \frac{2\gamma}{\gamma + 1} (M^2 - 1) \right] \quad (1)$$

$$\frac{T_2}{T_1} = \frac{P_2}{P_1} \left[ \frac{\left( \frac{\gamma + 1}{\gamma - 1} \right) + \frac{P_2}{P_1}}{1 + \left( \frac{\gamma + 1}{\gamma - 1} \right) \frac{P_2}{P_1}} \right] \quad (2)$$

$$\frac{P_5}{P_2} = \frac{(3\gamma - 1) \frac{P_2}{P_1} - (\gamma - 1)}{(\gamma - 1) \frac{P_2}{P_1} + (\gamma + 1)} \quad (3)$$

$$\frac{T_5}{T_2} = \frac{P_5}{P_2} \left[ \frac{\left( \frac{\gamma + 1}{\gamma - 1} \right) + \frac{P_5}{P_2}}{1 + \left( \frac{\gamma + 1}{\gamma - 1} \right) \frac{P_5}{P_2}} \right] \quad (4)$$

The initial fixed values are  $P_1=1$  bar,  $\gamma=1.4$  and  $T=300$  K, where M- Mach number,  $P_5$  and  $T_5$  stand for the reflected transient pressure and temperature at the end of the driven tube, respectively.

## **Analytical experiments**

### **Powder X-ray diffraction**

The analysis of Powder X-ray diffraction (PXRD) [Rigaku – Smart Lab X-Ray Diffractometer, Japan- CuK $\alpha$ 1 as the X-ray source ( $\lambda = 1.5407 \text{ \AA}$ ), with the step precision of  $\pm 0.001^\circ$ ] was performed over the diffraction angle from 10-90 degree. The high-power X-ray is 9 kW and focus type is line focus. Active area is  $384 \text{ mm}^2$  ( $19.2 \times 20 \text{ mm}$ ). Spatial resolution is  $75 \text{ }\mu\text{m}$  and Global count rate is  $2.5 \times 10^8$  ( $1 \times 10^6 \text{ cps/pixel}$ ). Efficiency of this technique with target material of Cu is 99 %. Highest flux X-ray source: PhotonMax, HyPix-3000 high energy resolution 2D detector, New CBO family, with fully automated beam switchable CBO-Auto and Various operando measurements with the new SmartLab Studio II.

### **Raman spectroscopy**

We investigated the Raman spectra of the control and shocked samples using a Renishaw 2000 micro confocal Raman spectrometer coupled with a 532 nm argon ionic excitation source and laser source energy is 50 mW. The spectral frequency of this spectrometer is  $100\text{-}3500 \text{ cm}^{-1}$  and the spectral resolution is  $0.75 \text{ cm}^{-1}$  (FWHM) and the depth resolution is 2 mm (100 X objectives). Single-crystal silicon with a characteristic Raman peak at  $520.0 \text{ cm}^{-1}$  was utilized to calibrate the Raman spectroscopy system prior to measurement. Raman spectra of the control and shocked SnO<sub>2</sub> NPs were gathered within the wavenumber range of  $100\text{--}3500 \text{ cm}^{-1}$  in the backscattering geometry with the spectral resolution of  $1.0 \text{ cm}^{-1}$  and the acquisition time was 120 secs. The laser spot size was  $50 \text{ }\mu\text{m}^2$  and the optical microscope's objective lens was used such that an X50 long working distance objective lens (WD = 10.6 mm) was utilized and the value of numerical aperture was 0.5 while the Raman data was collected by Renishaw Wire 5.1

instrument control and the data acquisition software. We processed the obtained Raman spectra with a Lorentzian-type function in Origin 9.0 software to extract the Raman peak position and its corresponding FWHM.

## Results

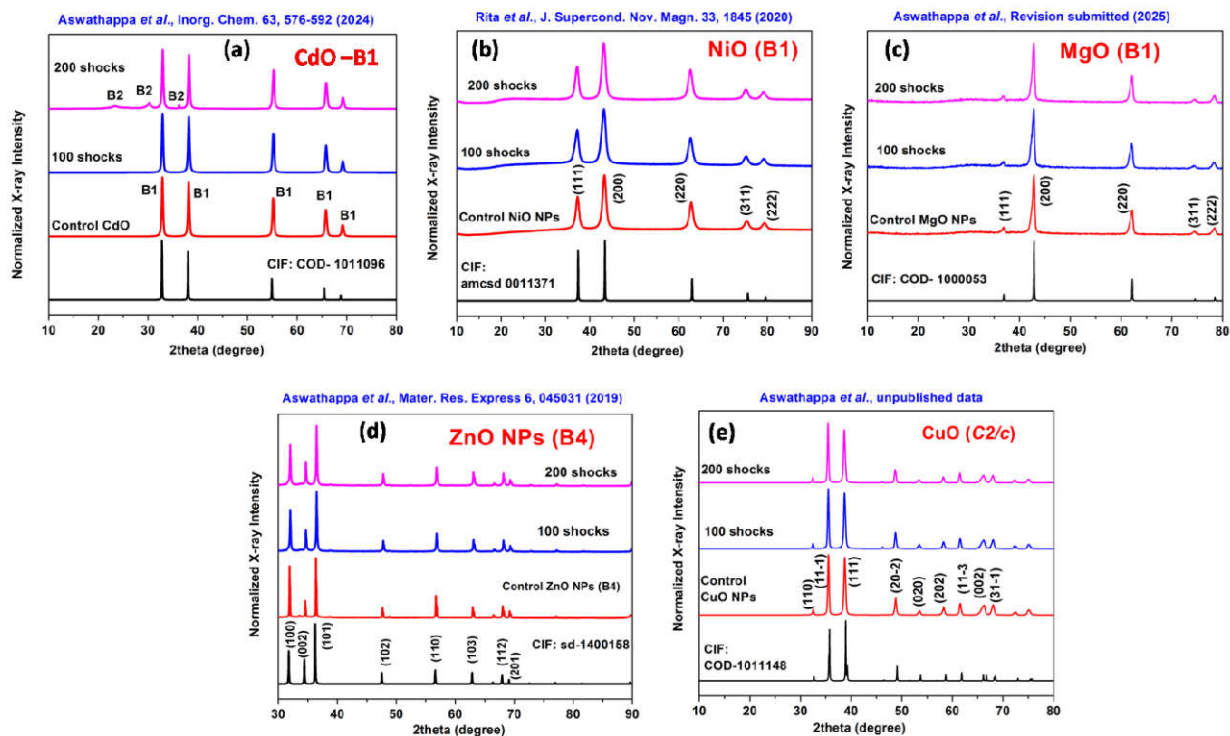

**Fig. S2** Structural response of the control shocked AX type NPs (a) CdO, (b) NiO, (c) MgO, (d) ZnO and (e) CuO (Note: here all the published XRD data are reproduced with required permission)

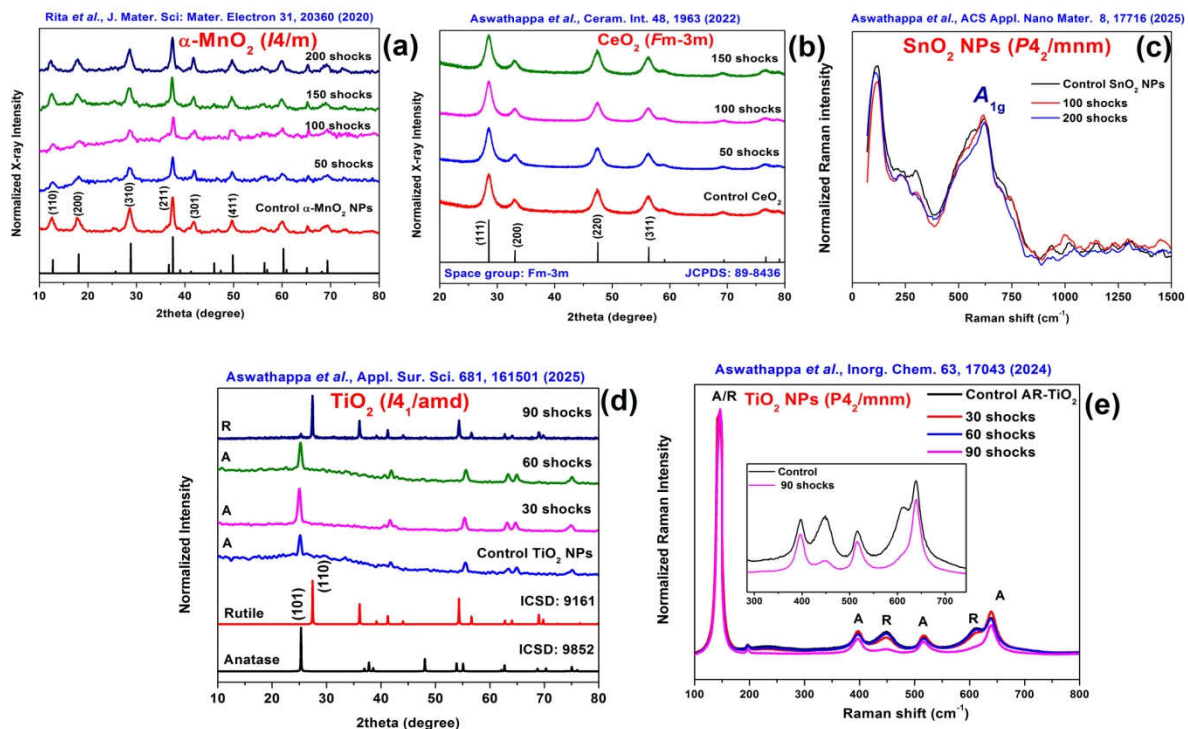

**Fig. S3** Structural response of the control shocked  $AX_2$  type NPs (a)  $\alpha\text{-MnO}_2$ , (b)  $\text{CeO}_2$ , (c)  $\text{SnO}_2$ , (d) A- $\text{TiO}_2$  and (e) R- $\text{TiO}_2$  (Note: here all the published XRD and Raman data are reproduced with required permission)



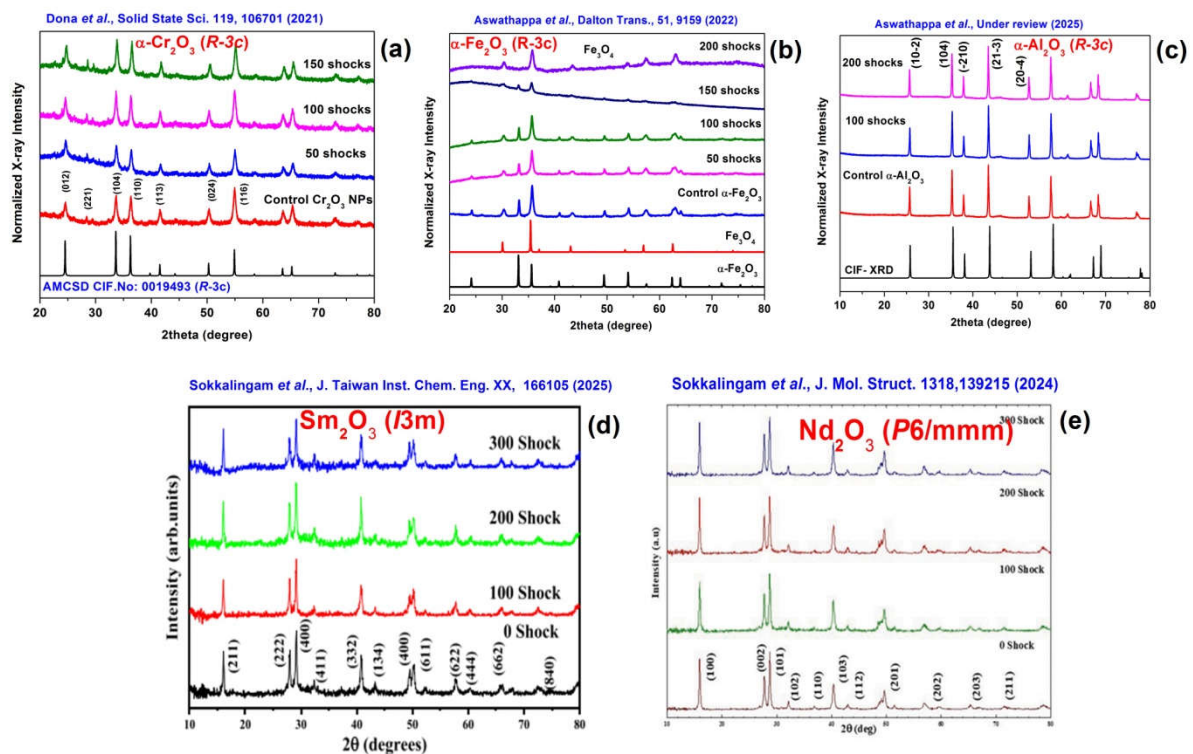

**Fig. S4** Structural response of the control shocked  $A_2X_3$  type NPs (a)  $\alpha\text{-Cr}_2\text{O}_3$ , (b)  $\alpha\text{-Fe}_2\text{O}_3$ , (c)  $\alpha\text{-Al}_2\text{O}_3$ , (d)  $\text{A-TiO}_2$  and (e)  $\text{R-TiO}_2$  (Note: here all the published XRD data are reproduced with required permission)

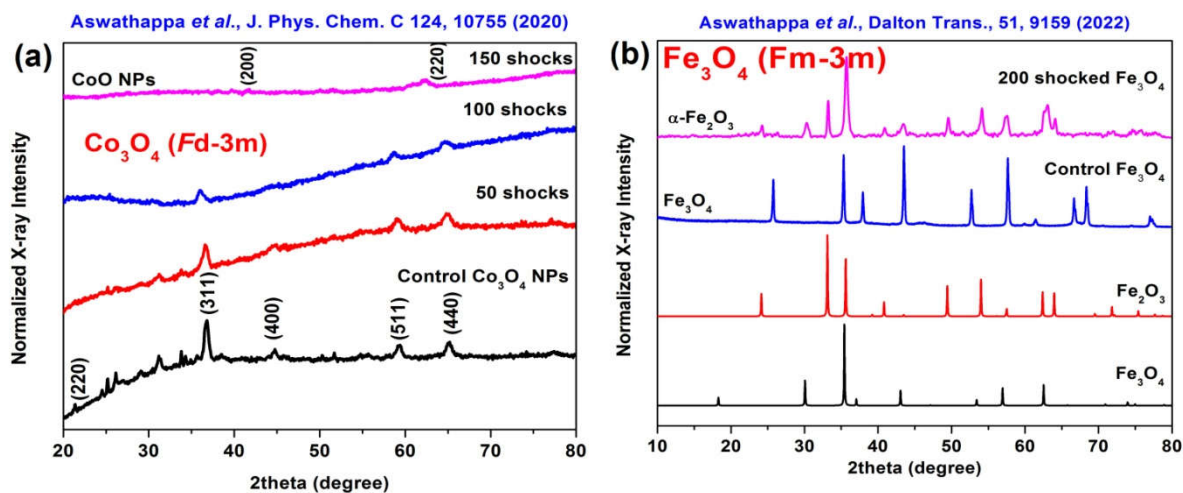

**Fig. S5** Structural response of the control shocked  $\text{A}_3\text{X}_4$  type NPs (a)  $\text{Co}_3\text{O}_4$  (b)  $\text{Fe}_3\text{O}_4$

(Note: here all the published XRD data are reproduced with required permission)

**Table. 1** Thermal conductivity-dependent phase stability details of the control and shocked metal oxides NPs with respect to the number of shock pulses

| S.NO | Materials                                | No. of shocks | Thermal conductivity ( $\text{Wm}^{-1}\text{K}^{-1}$ ) | Transient pressure and temperature | Phase transition route                                                     | Phase transition route | Ref   |
|------|------------------------------------------|---------------|--------------------------------------------------------|------------------------------------|----------------------------------------------------------------------------|------------------------|-------|
| 1    | A-TiO <sub>2</sub>                       | 90            | 1.5                                                    | 2.0 MPa and 864 K                  | anatase to rutile                                                          | K-path                 | [1,2] |
| 2    | R-TiO <sub>2</sub>                       | 90            | 3.4                                                    | 2.0 MPa and 864 K                  | rutile to anatase                                                          | -                      | [3]   |
| 3    | Fe <sub>3</sub> O <sub>4</sub>           | 200           | 3.5                                                    | 2.0 MPa and 864 K                  | Fe <sub>3</sub> O <sub>4</sub> - $\alpha$ -Fe <sub>2</sub> O <sub>3</sub>  | K-path                 | [4]   |
| 4    | CdO                                      | 200           | 8                                                      | 2.0 MPa and 864 K                  | B1-B2                                                                      | P-Path                 | [5]   |
| 5    | $\alpha$ -Fe <sub>2</sub> O <sub>3</sub> | 200           | 11                                                     | 2.0 MPa and 864 K                  | $\alpha$ -Fe <sub>2</sub> O <sub>3</sub> to Fe <sub>3</sub> O <sub>4</sub> | K-path                 | [4]   |
| 6    | Co <sub>3</sub> O <sub>4</sub>           | 150           | 12                                                     | 2.0 MPa and 864 K                  | Co <sub>3</sub> O <sub>4</sub> to CoO                                      | K-path                 | [6]   |
| 7    | $\alpha$ -MnO <sub>2</sub>               | 200           | 14.81                                                  | 2.0 MPa and 864 K                  | No transition                                                              | -                      | [7]   |
| 8    | CeO <sub>2</sub>                         | 150           | 16.99                                                  | 2.0 MPa and 864 K                  | No transition                                                              | -                      | [8]   |
| 9    | $\alpha$ -Cr <sub>2</sub> O <sub>3</sub> | 150           | 32.94                                                  | 2.0 MPa and 864 K                  | No transition                                                              | -                      | [9]   |
| 10   | SnO <sub>2</sub>                         | 200           | 35                                                     | 2.0 MPa and 864 K                  | No transition                                                              | -                      | [10]  |
| 11   | $\alpha$ -Al <sub>2</sub> O <sub>3</sub> | 200           | 36                                                     | 2.0 MPa and 864 K                  | No transition                                                              | -                      | [11]  |
| 12   | NiO                                      | 200           | 46.02                                                  | 2.0 MPa and 864 K                  | No transition                                                              | -                      | [12]  |
| 13   | MgO                                      | 200           | 49.9                                                   | 2.0 MPa and 864 K                  | No transition                                                              | -                      | [13]  |
| 14   | ZnO                                      | 200           | 54                                                     | 2.0 MPa and 864 K                  | No transition                                                              | -                      | [14]  |
| 15   | CuO                                      | 200           | 69                                                     | 2.0 MPa and 864 K                  | No transition                                                              | -                      | [15]  |
| 16   | Nd <sub>2</sub> O <sub>3</sub>           | 200           | -                                                      | 2.0 MPa and 864 K                  | No transition                                                              | -                      | [16]  |
| 17   | Sm <sub>2</sub> O <sub>3</sub>           | 200           | -                                                      | 2.0 MPa and 864 K                  | No transition                                                              | -                      | [17]  |

## References

- [1] S. Kalaiarasi, A. Sivakumar, S.A. Martin Britto Dhas, M. Jose, Shock wave induced anatase to rutile TiO<sub>2</sub> phase transition using pressure driven shock tube. *Mater. Lett.* 219, 72–75 (2018)
- [2] S. Aswathappa, L. Dai, S. S. J. Dhas, R. S. Kumar, E. Palaniyasan, Size-dependent anatase to rutile phase transition under acoustic shocked conditions – A case study of TiO<sub>2</sub> bulk and nanoparticles. *Appl. Surf. Sci.* 681, 161501 (2025)
- [3] S. Aswathappa, L. Dai, S. J. D. Sathiyadhas, R. S. Kumar, and M. V. Reddy, Acoustic shock wave-induced rutile to anatase phase transition of TiO<sub>2</sub> nanoparticles and exploration of their unconventional thermodynamic structural transition path of crystallization behaviors. *Inorg. Chem.* 63, 17043–17055 (2024)
- [4] S. Aswathappa, A. Rita, S. S. J. Dhas, K. P. J. Reddy, R. S. Kumar, A. I. Almansour, S. Chakraborty, K. Moovendaran, J. Sridhar and S. A. M. B. Dhas, Dynamic shock wave driven simultaneous crystallographic and molecular switching between  $\alpha$ -Fe<sub>2</sub>O<sub>3</sub> and Fe<sub>3</sub>O<sub>4</sub> nanoparticles – a new finding. *Dalton Trans.* 51, 9159–9166 (2022)
- [5] S. Aswathappa, L. Dai, S. S. J. Dhas, S. A. M. B. Dhas, S. Laha, R. S. Kumar, and A. I. Almansour, Acoustic shock wave-induced solid-state fusion of nanoparticles: a case study of the conversion of one-dimensional rod shape into three-dimensional honeycomb nanostructures of CdO for high performance energy storage materials. *Inorg. Chem.* 63, 576–592 (2024)
- [6] S. Aswathappa, S. Soundarya, S. S. J. Dhas, K. K. Bharathi, and S. A. M. B. Dhas, Shock wave driven solid state phase transformation of Co<sub>3</sub>O<sub>4</sub> to CoO nanoparticles. *J. Phys. Chem. C* 124, 10755–10763 (2020)

- [7] A. Rita, S. Aswathappa, S. Sahaya Jude Dhas, and S. A. M. B. Dhas, Reversible magnetic phase transitions of MnO<sub>2</sub> nano rods by shock wave recovery experiments. J. Mater. Sci: Mater. Electron 31, 20360–20367 (2020)
- [8] A. Sivakumar, S. Ramya, S. S. J. Dhas, A. I. Almansour, R. S. Kumar, N. Arumugam, M. Murugesan, S.A. M. B. Dhas, Assessment of crystallographic and electronic phase stability of shock wave loaded cubic cerium oxide nanoparticles. Ceram. Int. 48, 1963–1968 (2022)
- [9] E. D. Dona, A. Sivakumar, S. S. J. Dhas, P. Sivaprakash, S. Arumugam, S. A. M. B. Dhas, Sustainability of corundum-type Cr<sub>2</sub>O<sub>3</sub> nanoparticles at shock wave loaded conditions. Solid State Sci. 119, 106701 (2021)
- [10] S. Aswathappa, L. Dai, S. J. D. Sathiyadhas, R. S. Kumar, A. I. Almansour, S. Arumugam, M. Devaraj, and M. V. Reddy, Structural evolution of tin dioxide nanoparticles under acoustic shocked conditions for aerospace applications- implications of other rutile-type dioxides based on superheating approaches. ACS Appl. Nano Mater. 8, 17716–17730 (2025)
- [11] S. Aswathappa, L. Dai, S. J. D. Sathiyadhas, R. S. Kumar, A. I. Almansour, M. Vijayan and R. Arul, Crystal structure response of corundum-type structures ( $\alpha$ -Al<sub>2</sub>O<sub>3</sub> and  $\alpha$ -Fe<sub>2</sub>O<sub>3</sub>) under dynamic acoustic shocked conditions and comparison between static high-temperature and high-pressure conditions – Implications on volume-pressure-related phase transition types. (Communicated-2025)
- [12] A. Rita, S. Aswathappa and S. A. M. B. Dhas, Investigation of structural and magnetic phase behaviour of nickel oxide nanoparticles under shock wave recovery experiment. J. Supercond. Nov. Magn. 33, 1845–1849 (2020)

- [13] S. Aswathappa, L. Dai, S. J. D. Sathiyadhas, R. S. Kumar, A. I. Almansour, C. L. Selvakumar, V. V. Nallagounder and E. H. Modhi, Acoustic shock wave-induced crystal-structure and micro-structural stabilities of typical cubic lattice materials of MgO and CdO nanoparticles based on the superheating-melting approach. (Under review- 2025)
- [14] S. Aswathappa, C. Victor, M. M. Nayak and S. A. M. B. Dhas, Structural, optical, and morphological stability of ZnO nano rods under shock wave loading conditions. Mater. Res. Express 6, 045031 (2019)
- [15] S. Aswathappa, L. Dai, S. J. D. Sathiyadhas, R. S. Kumar, A. I. Almansour, C. L. Selvakumar, Acoustic shock wave-induced crystal-structure and micro-structural stabilities of CuO nanoparticles based on the superheating-melting approach. (Unpublished data)
- [16] R. Sokkalingam, G. D. Raja, A. Panghal, S. S. Roy, E. M. Sankaran, B. A. Arumugam Sonachalam, Enhancing photocatalytic dye degradation efficiency through the utilization of shock wave effects on neodymium oxide ( $\text{Nd}_2\text{O}_3$ ). J. Mol. Struct. 1318, 139215 (2024)
- [17] R. Sokkalingam, A. Panghal, S. S. Roy, E. M. Sankaran, A. Sonachalam, Impact of shockwaves on the structural and morphological characteristics of the  $\text{Sm}_2\text{O}_3$  compound for wastewater treatment. J. Taiwan Inst. Chem. Eng. XX, 106105 (2025)
